# Supplementary material for: Discrete Molecular Dynamics Can Predict Helical Prestructured Motifs in Disordered Proteins
Source: PubMed Central journal article supplement (PMC3998973; doi:10.1371/journal.pone.0095795), 2014-04-24
Supplement: pone.0095795.s001.pdf [file pone.0095795.s001.pdf]

## SUPPORTING INFORMATION

### Discrete molecular dynamics can predict prestructured motifs in disordered proteins

Dániel Szöllősi, Tamás Horváth, Kyou-Hoon Han, Nikolay V. Dokholyan, Péter Tompa,  
Lajos Kalmár, Tamás Hegedűs

MTA-SE Molecular Biophysics Research Group, Hungarian Academy of Sciences, Budapest, Hungary

**Figure S1**  $\alpha$ -helical propensities in KID using RX-DMD. RX-DMD simulations using 8 replicas were performed for all the experimentally investigated proteins with PresMo, collected in the review of Lee *et al.*[1]  $\alpha$ -helical propensities of the conformational ensembles at each simulation temperature were determined and plotted as described in Methods. KID is shown as an example, while the results for all other proteins and temperatures can be found at <http://disorder.hegelab.org>. Green boxes: PresMo regions determined experimentally [2,3].

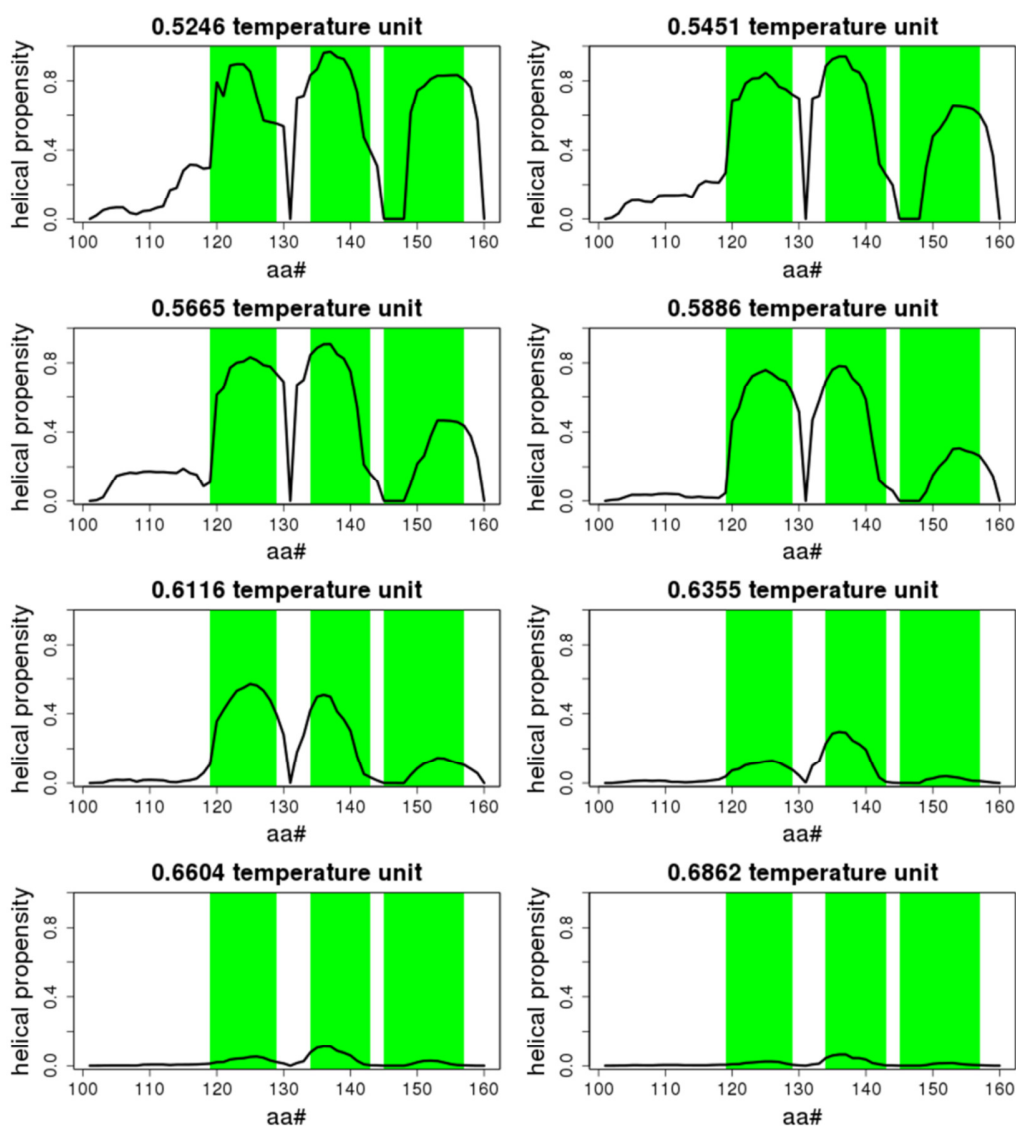

**Figure S2** Comparing RX-DMD and Agadir predictions. Helical contents of the 24 protein segments with experimentally determined PreSMOs were also predicted using Agadir [4]. From 65 PreSMOs in these proteins 18 were detected by Agadir at 5% threshold based on the work of Bystroff and Garde [5], while 45 were detected by RX-DMD. Interestingly, in many cases when Agadir and RX-DMD match exactly the same regions, such as in the case of the first PreSMo in KID presented in this figure. In addition, RX-DMD finds 32 PreSMOs not detected experimentally, while Agadir does 8. It is important to note that these numbers do not necessary indicate false positives, since many PreSMOs might exist and be not visible by NMR because of their rate of conformational transitions. Agadir and RX-DMD predictions are identical in many cases also in the case of PresMos not detected by experiments that may be employed to filter out false positives. Black: RX-DMD; blue: Agadir.

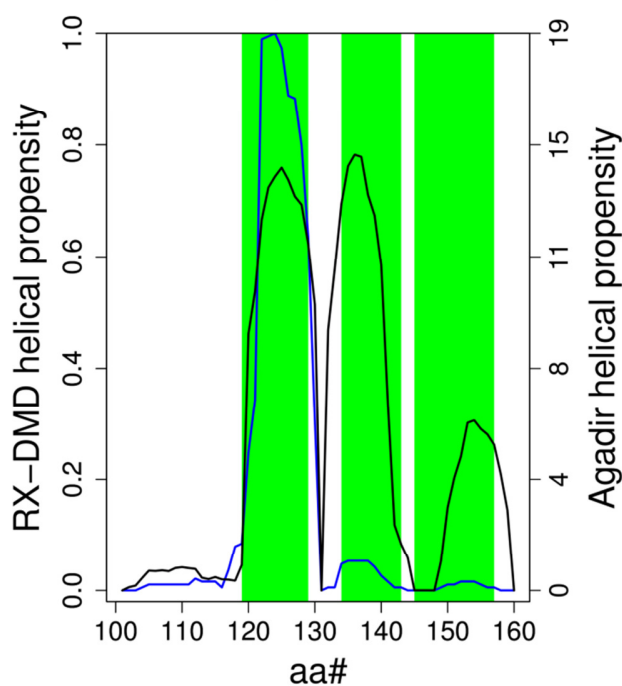

**Figure S3**  $R_g$  distribution of  $\alpha$ -Synuclein ensembles from RX-DMD simulations is similar to that determined in experiments [6].

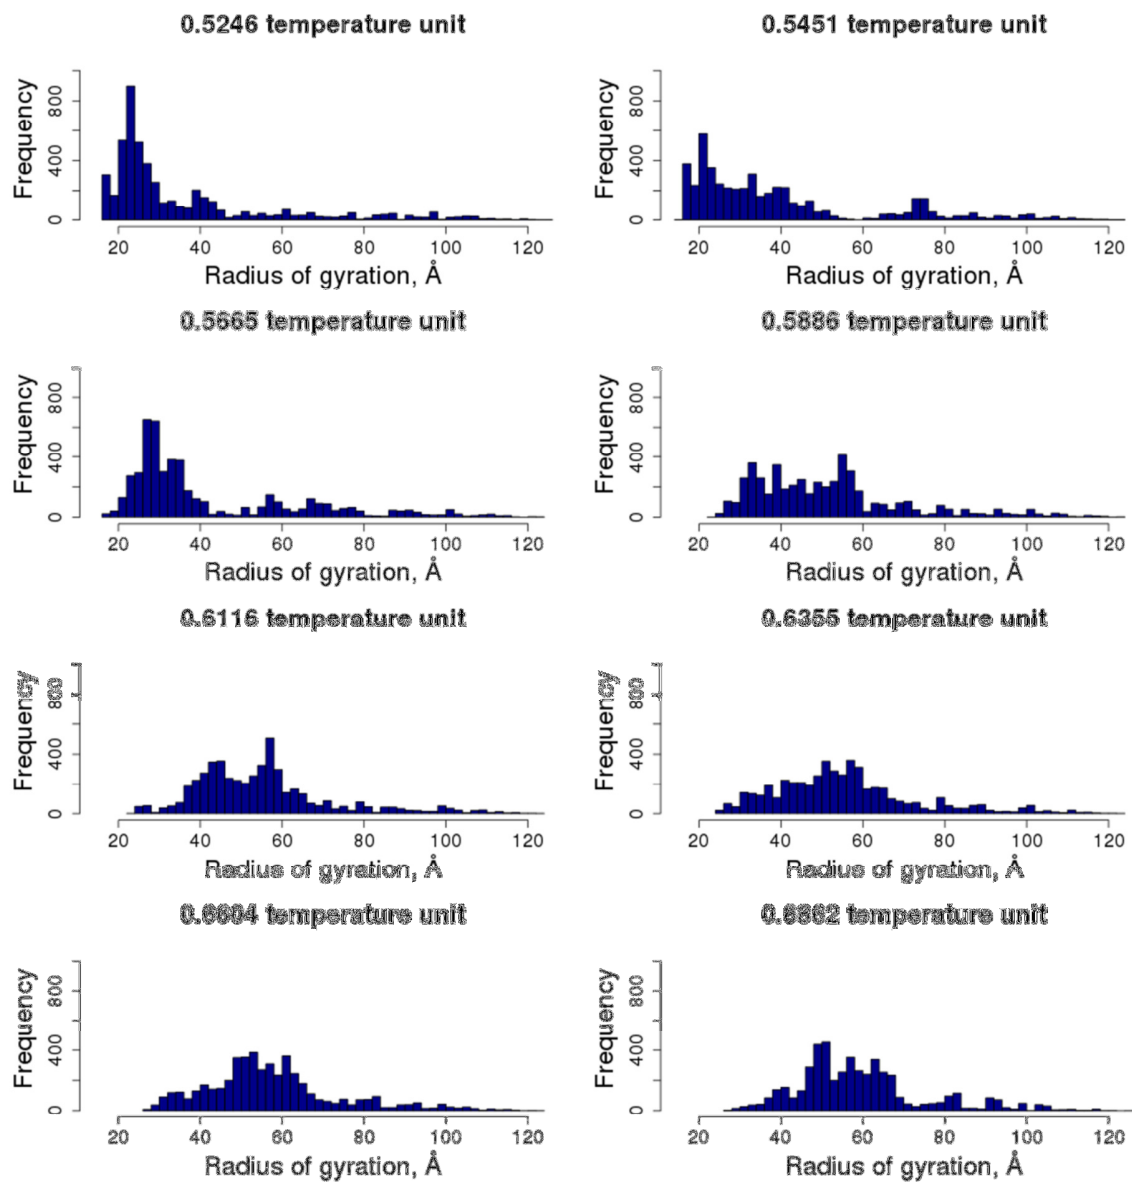

**Table S1.** Prediction of RX-DMD compared to complexes observed in X-ray structures. Four segments from transmembrane proteins and 86 segments out of 97 PDB entries, which exhibited at least one region with 20% of helical propensity, are listed. From this 90 segments in 36 cases were the prediction in good agreement with the experimental results (only a few a.a. difference). This observation suggests that significant portion of PresMos have a direct role in binding and are MoREs.

\*sequences and their boundaries can be found at <http://disorder.hegelab.org>

\*\*marks selected membrane proteins

| UniProtACC(PDB ID) | Experimental MoREs | RX-DMDPresMos*                     |
|--------------------|--------------------|------------------------------------|
| Q13936 (1T0J)**    | 428-445            | 408-444, 491-521                   |
| Q13936 (2BE6)**    | 1660-1673          | 1631-1651, 1662-1685, 1694-1700    |
| P19634 (2BEC)**    | 503-545, 622-689   | 503-552, 554-562, 627-636, 658-683 |
| Q9UKV5 (3H8K)**    | 574-601, 622-640   | 573-603,622-641                    |
| A1L0Z0 (3AFR)      | 624-634            | 628-634,639-644                    |
| B2RA72 (3EAB)      | 171-191            | 177-195                            |
| O00401 (2VCP)      | 433-451            | 434-443                            |
| O00512 (2VP7)      | 348-373            | 352-373                            |
| O00512 (2VP7)      | 175-201            | 175-180,182-194,201-209            |
| O15047 (4EWR)      | 1490-1499          | 1502-1513                          |
| O15234 (3EX7)      | 216-246            | 205-226,230-240                    |
| O33246 (3M91)      | 25-51              | 37-61                              |
| O35274 (3EGG)      | 446-486            | 464-469,497-502                    |
| O43312 (2D1K)      | 725-753            | 726-737                            |
| O43516 (2A41)      | 29-60              | 34-36                              |
| O88797 (3H8D)      | 676-713            | 680-689,694-710                    |
| O96013 (2OV2)      | 10-44              | 14-31,38-42                        |
| P01094 (1DP5)      | 2-32               | 5-18,25-37                         |
| P01096 (1OHH)      | 29-63              | 11-21,55-77                        |
| P03255 (2R7G)      | 40-49              | 22-30,41-50                        |
| P03255 (2R7G)      | 53-85              | 41-50                              |
| P04637 (2L14)      | 372-388            | 367-388                            |
| P04637 (2L14)      | 14-54              | 16-25,40-41,47-54                  |
| P05412 (1A02)      | 272-308            | 256-290,293-312                    |
| P05889 (1FGL)      | 218-228            | 203-244                            |
| P09052 (2IHS)      | 184-203            | 174-184,195-200                    |
| P0AFX7 (3M4W)      | 169-190            | 163-194                            |
| P0DJ89 (2LNH)      | 268-307            | 269-282,316-326                    |
| P13199 (2YKA)      | 107-120            | 109-116                            |
| P14598 (1K4U)      | 359-387            | 372-376,380-388                    |
| P14653 (1B72)      | 177-185            | 175-186                            |

|               |           |                                 |
|---------------|-----------|---------------------------------|
| P17676 (1H88) | 292-334   | 274-281,289-323,325-333         |
| P23615 (3OAK) | 239-263   | 240-250,258-269                 |
| P25054 (1JPP) | 1021-1034 | 1003-1015,1024-1038             |
| P25054 (1JPP) | 1468-1496 | 1486-1493                       |
| P26368 (1JMT) | 90-111    | 83-91,104-113                   |
| P27321 (3BOW) | 571-588   | 565-583                         |
| P27782 (3OUW) | 48-60     | 31-35,53-54                     |
| P35465 (1E0A) | 75-108    | 100-107                         |
| P35579 (3ZWH) | 1893-1935 | 1874-1904,1907-1923             |
| P36108 (2V6X) | 184-206   | 167-175                         |
| P38968 (2QTV) | 907-942   | 913-920                         |
| P40019 (2JSS) | 65-125    | 70-86,88-122                    |
| P40056 (3ZS9) | 6-38      | 3-22                            |
| P40344 (3T7G) | 133-142   | 129-145,152-155                 |
| P40855 (3AJB) | 15-34     | 9-31                            |
| P42226 (1OJ5) | 795-808   | 800-810                         |
| P42768 (1CEE) | 230-277   | 260-274,287-290                 |
| P45481 (1KBH) | 2060-2117 | 2044-2046,2065-2076,2099-2110   |
| P46937 (3KYS) | 52-73     | 65-71                           |
| P49054 (2DOI) | 90-108    | 72-127                          |
| P52292 (1QGK) | 11-54     | 10-23,25-52                     |
| P55036 (1P9D) | 271-298   | 284-302                         |
| P68807 (2DF4) | 3-100     | 9-19,30-41,52-69,74-87          |
| P70211 (3PZD) | 1410-1443 | 1418-1443                       |
| P70365 (4DMA) | 691-701   | 687-700                         |
| Q03164 (3U88) | 107-135   | 127-132,145-147                 |
| Q03164 (3U88) | 3755-3770 | 3739-3747,3767-3784             |
| Q04839 (3LCN) | 126-148   | 123-138,144-163                 |
| Q12420 (3PLV) | 37-56     | 25-30,59-60                     |
| Q12420 (3PLV) | 7-24      | 9-19,26-36                      |
| Q15648 (1RJK) | 640-650   | 643-651                         |
| Q5U5Q9 (3A1Q) | 81-120    | 69-98,102-124                   |
| Q5VZK9 (3LK3) | 971-1004  | 959-968,977-987                 |
| Q61026 (3MNE) | 741-750   | 738-751,765-768                 |
| Q6R3M4 (2KWU) | 680-709   | 695-708                         |
| Q7DB77 (2ZQK) | 277-314   | 277-282,284-287,311-318,320-321 |
| Q87GE5 (3M1F) | 130-151   | 133-144                         |
| Q8BN74 (2QGT) | 687-698   | 681-696                         |
| Q8WXE9 (2JXC) | 308-340   | 330-344                         |
| Q92934 (1G5J) | 103-127   | 102-127                         |

|               |           |                 |
|---------------|-----------|-----------------|
| Q95PA1 (1L4A) | 51-75     | 34-80           |
| Q96CF2 (3C3R) | 221-233   | 209-232         |
| Q99ML1 (2ROC) | 131-156   | 127-162,167-175 |
| Q9BY43 (3C3O) | 210-222   | 206-220         |
| Q9H444 (3C3Q) | 209-224   | 204-221         |
| Q9HAU5 (2WJV) | 1105-1128 | 1107-1128       |
| Q9KWH9 (1F02) | 294-317   | 285-289,316-333 |
| Q9U1K1 (3UE5) | 463-481   | 464-475         |
| Q9U1K1 (3UE5) | 2-19      | 28-37           |
| Q9UBK2 (3CS8) | 141-152   | 141-148         |
| Q9UBK2 (3CS8) | 205-218   | 207-215         |
| Q9Y3E7 (2XZE) | 202-222   | 196-220         |
| Q9Y5B0 (1J2X) | 944-961   | 943-960         |
| Q9Y5X1 (3LGE) | 164-182   | 173-186         |
| Q9Y618 (2GPV) | 1319-1330 | 1316-1332       |
| Q9Y618 (2GPV) | 2337-2345 | 2353-2364       |
| Q9Y6J0 (1N6J) | 2159-2184 | 2166-2189       |
| Q9Y6Q9 (3L3Z) | 735-746   | 729-744,749-754 |
| Q9YGY0 (1QZ7) | 467-482   | 461-464,470-480 |

## References

1. Lee SH, Kim DH, Han JJ, Cha EJ, Lim JE, et al. (2012) Understanding pre-structured motifs (PreSMos) in intrinsically unfolded proteins. *Curr Protein Pept Sci* 13: 34-54.
2. Radhakrishnan I, Perez-Alvarado GC, Dyson HJ, Wright PE (1998) Conformational preferences in the Ser133-phosphorylated and non-phosphorylated forms of the kinase inducible transactivation domain of CREB. *FEBS Lett* 430: 317-322.
3. Radhakrishnan I, Perez-Alvarado GC, Parker D, Dyson HJ, Montminy MR, et al. (1997) Solution structure of the KIX domain of CBP bound to the transactivation domain of CREB: a model for activator:coactivator interactions. *Cell* 91: 741-752.
4. Lacroix E, Viguera AR, Serrano L (1998) Elucidating the folding problem of alpha-helices: local motifs, long-range electrostatics, ionic-strength dependence and prediction of NMR parameters. *J Mol Biol* 284: 173-191.
5. Bystroff C, Garde S (2003) Helix propensities of short peptides: molecular dynamics versus bioinformatics. *Proteins* 50: 552-562.
6. Allison JR, Varnai P, Dobson CM, Vendruscolo M (2009) Determination of the free energy landscape of alpha-synuclein using spin label nuclear magnetic resonance measurements. *J Am Chem Soc* 131: 18314-18326.
